# Supplementary material for: Genome-Wide Analysis of MYB Transcription Factor Gene Superfamily Reveals BjPHL2a Involved in Modulating the Expression of BjCHI1 in Brassica juncea
Source: MDPI journal article supplement (doi:10.3390/plants12051011), 2023-02-23
Supplement: s1 [file s1]

Figure S1.

|                                             |                                                                |     |
|---------------------------------------------|----------------------------------------------------------------|-----|
| BjuA005498-BjPHL2a1                         | MY-SAIRSLPLDGGDYHGPLDGTNLPGDACLVLTTDPKPRLRWTAE LHERFVDAVTLGG   | 59  |
| BjuB039462-BjPHL2b1                         | MYSAAIRSLPLD-GDYHGPLDGTNLPGDACLVLTTDPKPRLRWTAE LHERFVDAVTLGG   | 59  |
| BjMYB1                                      |                                                                | 0   |
| BjuA012774-BjPHL2a                          | -MYSAIRSLPLDGGGEYHGPLDGTNLPGDACLVLTTDPKPRLRWTAE LHERFVEAVTELGG | 59  |
| BjuB032221-BjPHL2b                          | -MYSAIRSLALDGGGEYHGPLDGTNLPGDACLVLTTDPKPRLRWTAE LHEKFVEAVTELGG | 59  |
|                                             |                                                                |     |
| BjuA005498-BjPHL2a1                         | PDKATPKTLMRTMGVKGLTLYHLKSHLQKFRLGRQACKDSTDNS-KDASCVGESQDTGSS   | 118 |
| BjuB039462-BjPHL2b1                         | PEKATPKTLMRTMGVKGLTLYHLKSHLQKFRLGRQACKESTENS-KDASCVGESQDTGSS   | 118 |
| BjMYB1                                      |                                                                | 47  |
| BjuA012774-BjPHL2a                          | PEKATPKTLMRTMGVKGLTLYHLKSHLQKFRLGRQACKESTDNSNKDASCVGESQDTGSS   | 119 |
| BjuB032221-BjPHL2b                          | PEKATPKTLMRTMGVKGLTLYHLKSHLQKFRLGRQACKESTDNS-KDASCVGESQDTGSS   | 118 |
| *****:*. * *****                            |                                                                |     |
|                                             |                                                                |     |
| BjuA005498-BjPHL2a1                         | SSSSLRMAAQEQNEGYQVTEALRAQMEVQRRLEHQLVQRRQLR IEAQGKYLQSIL       | 178 |
| BjuB039462-BjPHL2b1                         | SSSSLRMAAQEQNEGYQVTEALRAQMEVQRRLEHQLVQRRQLR IEAQGKYLQSIL       | 175 |
| BjMYB1                                      | SSSSLRMAAQEQNEGYQVTEALRAQMEVQRRLEHQLVQRRQLR IEAQGKYLQSIL       | 107 |
| BjuA012774-BjPHL2a                          | SPSSLKLA AQEQNESYQVTEALRAQMEVQRRLEHQLVQRRQLVRIEAQGKYLQSIL      | 176 |
| BjuB032221-BjPHL2b                          | SPSSLRLAAQEQNEGYQVTEALRAQMEVQRRLEHQLVQRRQLVRIEAQGKYLQSIL       | 175 |
| * *: *****:***** *****:*****                |                                                                |     |
|                                             |                                                                |     |
| BjuA005498-BjPHL2a1                         | EKACKAFDDQAAAFVGLEAAREELSELAIKVSNSSQGT-AVPFFDTTKM-MMMPSLESEL   | 236 |
| BjuB039462-BjPHL2b1                         | EKACQAFDDQAAAFVGLEAAREELSELAIKVS---QGT-AVPFLDATKM-MMMPSLSELE   | 230 |
| BjMYB1                                      | EKACQAFDDQAAAFVGLEAAREELSELAIKVS---QGT-AVPFLDATKM-MMMPSLSELE   | 162 |
| BjuA012774-BjPHL2a                          | EKACKAFDEQAAMFTGLETAREELSELAIKVSNSSQGA-TVPFYDATKMMMMPSLSELE    | 235 |
| BjuB032221-BjPHL2b                          | EKACKAFEEQAVTFGGLETAREELSDLAIKSSSSQGTTPVYF DATKMMMMPSLSELE     | 235 |
| ***:*. *. * *:*****:***. * *: :*:*. * ***** |                                                                |     |
|                                             |                                                                |     |
| BjuA005498-BjPHL2a1                         | VAV-DTK-NNITTNCVSSLTSNTNGSSVSAASMKKRLRGDDVGLGYEAGWNPSSSTI      | 294 |
| BjuB039462-BjPHL2b1                         | VAI-DTK-NNITTNCVSSLTSNTNGSSVSAASMKKRHRGDDVGLGYEAGWIVPSSTIG     | 288 |
| BjMYB1                                      | VAI-DTK-NNITTNCVSSLTSNTNGSSVSAASMKKRHRGDDVGLGYEAGWIVPSSTIG     | 220 |
| BjuA012774-BjPHL2a                          | VAAIDHKSNI TTNCVSSLTSNTNGSSVSAASMKKRHRGGD-NVGYEGSWTPGSTMG      | 294 |
| BjuB032221-BjPHL2b                          | VAAIDQKSNIT-TNCVSSLTSNTNGSSVSAASMKKRHRG-D-SVGYEASWIMPSSTIG     | 292 |
| ** * * * ***** ** * . :***. * *:*           |                                                                |     |
|                                             |                                                                |     |
| BjuA005498-BjPHL2a1                         | G                                                              | 295 |
| BjuB039462-BjPHL2b1                         | -                                                              | 288 |
| BjMYB1                                      | -                                                              | 220 |
| BjuA012774-BjPHL2a                          | -                                                              | 294 |
| BjuB032221-BjPHL2b                          | -                                                              | 292 |

Figure S1. Multiple sequence alignment of BjPHL2 subclade members.

The protein sequences of all BjPHL2 subclade members are aligned with

Clustal Omega (<https://www.ebi.ac.uk/Tools/msa/clustalo/>). The 71-amino acid-long deletion at the N-terminal and a YGQ insertion in the central between BjMYB1 and BjPHL2b1 are indicated in yellow box.

Figure S2.

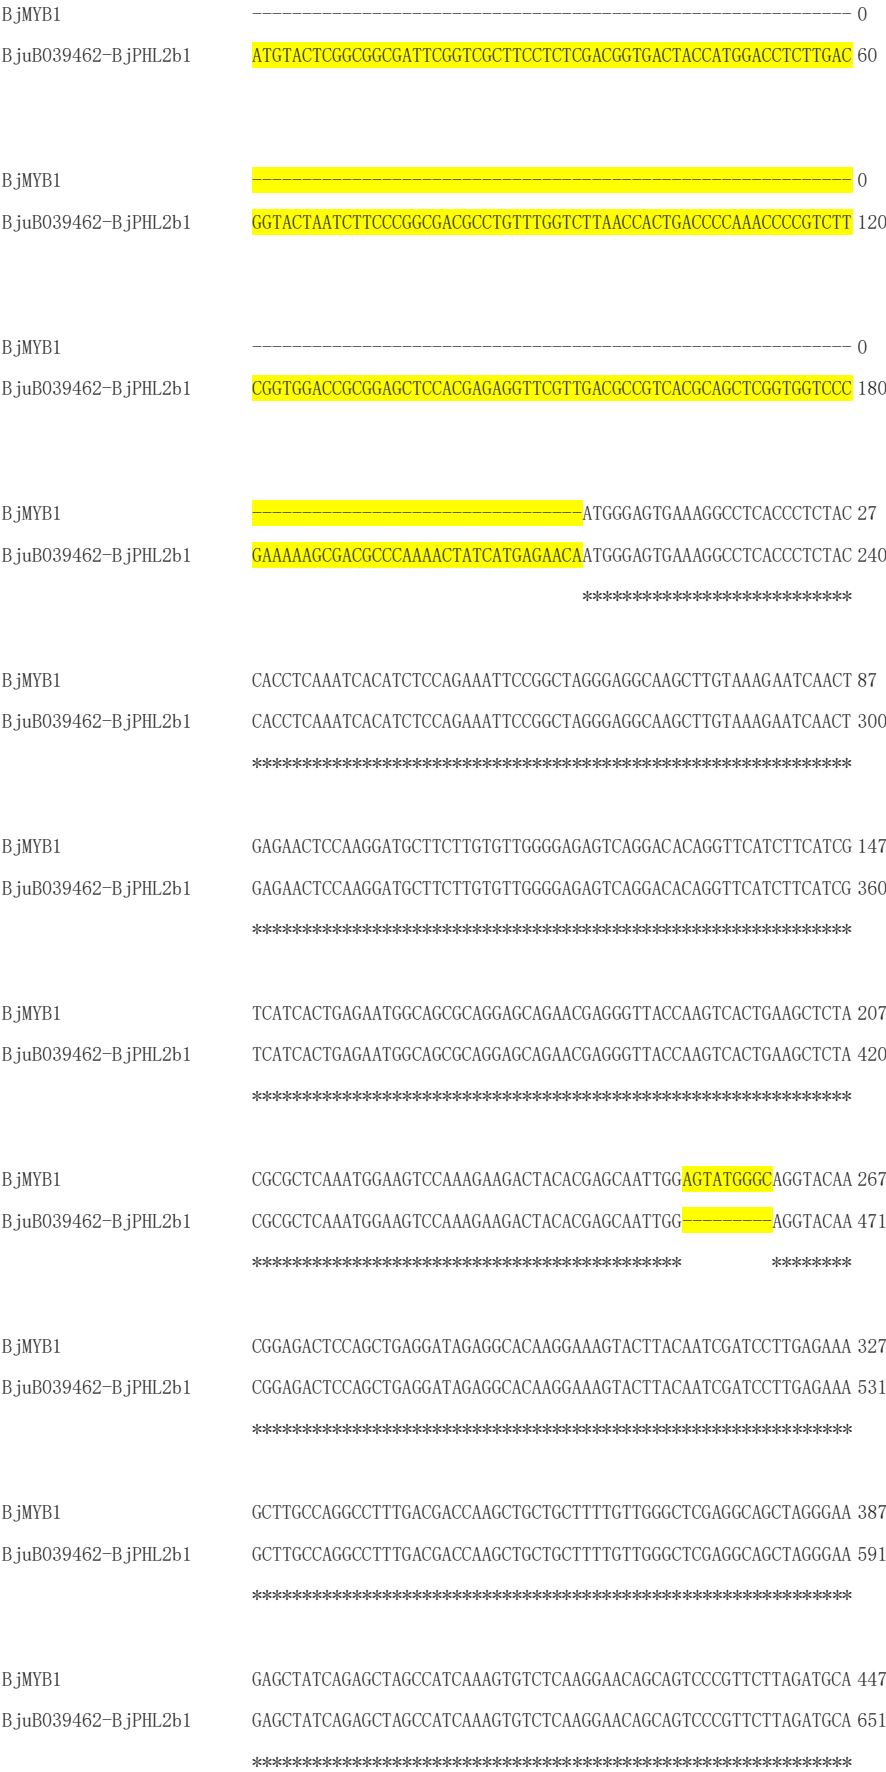

|                     |                                                               |                     |
|---------------------|---------------------------------------------------------------|---------------------|
| BjMYB1              | ACAAAGATGATGATGATGCCATCTTTGTCTGAGCTTGAAGTAGC                  | ATAGACACCAAAAAC 507 |
| BjuB039462-BjPHL2b1 | ACAAAGATGATGATGATGCCATCTTTGTCTGAGCTTGAAGTAGC                  | ATAGACACCAAAAAC 711 |
| *****               |                                                               |                     |
| BjMYB1              | AACATCACAACCAACTGTTTCGGTTGAAAGCTCTCTGACTTCCAACACCAATGGGAGCTCG | 567                 |
| BjuB039462-BjPHL2b1 | AACATCACAACCAACTGTTTCGGTTGAAAGCTCTCTGACTTCCAACACCAATGGGAGCTCG | 771                 |
| *****               |                                                               |                     |
| BjMYB1              | GTTTCTGCTGCATCGATGAAGAAGCGGCATCGTGGAGACGATGTAGGCCTAGGGTACGAG  | 627                 |
| BjuB039462-BjPHL2b1 | GTTTCTGCTGCATCGATGAAGAAGCGGCATCGTGGAGACGATGTAGGCCTAGGGTACGAG  | 831                 |
| *****               |                                                               |                     |
| BjMYB1              | GCAGGGTGGATTGTGCCTAGTAGTACCATTGGATAA                          | 663                 |
| BjuB039462-BjPHL2b1 | GCAGGGTGGATTGTGCCTAGTAGTACCATTGGA---                          | 864                 |
| *****               |                                                               |                     |

**Figure S2. Sequence alignment of BjMYB1 and BjPHL2b1 at the CDS level.** The CDS sequences of BjMYB1 and BjPHL2b1 are aligned with Clustal Omega. The observed 213 nt absence in the 5' end, 9 nt insertion in the central and a G to A replacement at 3' end between BjMYB1 and BjPHL2b1 are indicated by yellow box.

### Figure S3.

|                     |                                                               |     |
|---------------------|---------------------------------------------------------------|-----|
| BjuB039462-BjPHL2b1 | MYSAAIRSLPLDGDYHGFLDGTNLPGDACLVLTTDPKPRLRWTAE LHERFVDAVTQLGGP | 60  |
| BjMYB1              |                                                               | 0   |
| *****               |                                                               |     |
| BjuB039462-BjPHL2b1 | EKATPKTIMRTMGVKGLTLYHLKSHLQKFRLGRQACKESTENSKDASCVGESQDTGSSSS  | 120 |
| BjMYB1              | MGVKGLTLYHLKSHLQKFRLGRQACKESTENSKDASCVGESQDTGSSSS             | 49  |
| *****               |                                                               |     |
| BjuB039462-BjPHL2b1 | SSLRMAAQEQNEGYQVTEALRAQMEVQRRLHEQLE---VQRRLQLRIEAQGKYLQSILEK  | 177 |
| BjMYB1              | SSLRMAAQEQNEGYQVTEALRAQMEVQRRLHEQLEYGQVQRRLQLRIEAQGKYLQSILEK  | 109 |
| *****               |                                                               |     |
| BjuB039462-BjPHL2b1 | ACQAFDDQAAAFVGLEAAREELSE LAIKVSQGTAVPFLDATKMMMP SLSELEVAIDTKN | 237 |
| BjMYB1              | ACQAFDDQAAAFVGLEAAREELSE LAIKVSQGTAVPFLDATKMMMP SLSELEVAIDTKN | 169 |
| *****               |                                                               |     |
| BjuB039462-BjPHL2b1 | NITTNCSESSLTSNTNGSSVSAASMKKRHRGDDVGLGYEAGWIVPSSTIG            | 288 |
| BjMYB1              | NITTNCSESSLTSNTNGSSVSAASMKKRHRGDDVGLGYEAGWIVPSSTIG            | 220 |
| *****               |                                                               |     |

**Figure S3. Sequence alignment of BjMYB1 and BjPHL2b1 at the protein level.** The protein sequences of BjMYB1 and BjPHL2b1 are aligned with Clustal Omega. The observed 71-amino acid-long deletion at the N-terminal and a YGQ insertion in the central between BjMYB1 and BjPHL2b1 are indicated in yellow box.

Figure S4.

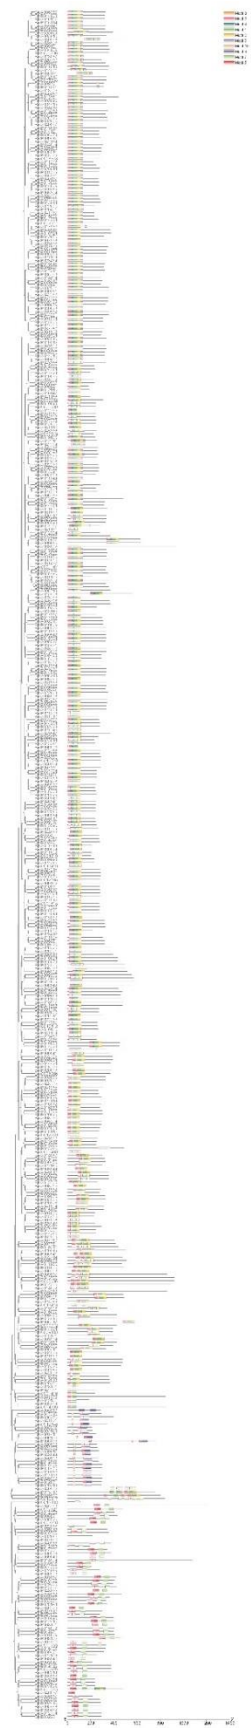

**Figure S4. Protein architecture of BjMYBs.** The distribution of conserved motifs identified from 502 BjMYB proteins are predicted using the MEME (Multiple Em for Motif Elicitation) tool. Each motif is represented by a number in colored box. See Table S2 for detailed motif information.
